# Supplementary material
Source: PubMed Central journal article supplement (PMC3526896)
Supplement: Supp_Data.pdf [file Supp_Data.pdf]

## Supplementary Data

SUPPLEMENTARY TABLE S1. COMPLETE LIST OF IDENTIFIED PEPTIDES IN COPPER ZINC SUPER OXIDE DISMUTASE

| <i>Peptide sequence</i>                                   | $[M+H]^+$ | <i>m/z</i> |
|-----------------------------------------------------------|-----------|------------|
| <sup>4</sup> AVCVLKGDPVQGIINFEQK <sup>23, a</sup>         | 2172.1    | 725.3      |
| <sup>10</sup> GDGPVQGIINFEQK <sup>23</sup>                | 1501.7    | 751.7      |
| <sup>24</sup> ESNGPVKVVWGSIK <sup>36</sup>                | 1400.8    | 701.3      |
| <sup>80</sup> HVGDLGNVTADK <sup>91, a</sup>               | 1225.6    | 613.6      |
| <sup>80</sup> HVGDLGNVTADKDGADV                           | 3720.8    | 1241.6     |
| SIEDSVISLSGDHCCIIGR <sup>115</sup>                        |           |            |
| <sup>31</sup> VWGSIK <sup>36, a</sup>                     | 689.4     | 345.3      |
| <sup>92</sup> DGVADVSIEDSVISLSGDHCCIIGR <sup>115, a</sup> | 2514.2    | 839.2      |
| <sup>116</sup> TLVVHEK <sup>122, a</sup>                  | 825.5     | 413.2      |
| <sup>116</sup> TLVVHEKADDLGK <sup>128</sup>               | 1242.8    | 713.3      |
| <sup>123</sup> ADDLGKGGNEESTK <sup>136</sup>              | 1420.6    | 711.2      |
| <sup>123</sup> ADDLGKGGNEESTKTGNAGSR <sup>143</sup>       | 2063.9    | 689.1      |
| <sup>137</sup> TGNAGSRLACGVIGIAQ <sup>153</sup>           | 1644.8    | 823.3      |
| <sup>144</sup> LACGVIGIAQ <sup>153, a</sup>               | 1001.5    | 1001.4     |

<sup>a</sup>peptides are also found in corresponding oxidized form.

SUPPLEMENTARY TABLE S2. HYDROGEN PEROXIDE  
LEVEL IN EXHALED BREATH

| <i>H<sub>2</sub>O<sub>2</sub> concentration in exhaled<br/>breath/exhaled breath condensate</i>                     | <i>Reference</i>                                       |
|---------------------------------------------------------------------------------------------------------------------|--------------------------------------------------------|
| Normal: 0.024 ± 0.016 M<br>Asthma: 0.127 ± 0.083 M<br>( <i>p</i> < 0.001).                                          | Emelyanov <i>et al.</i><br>Chest 2001; 120(4): 1136–9. |
| Normal: 0.2 μM [95% CI,<br>0.16 to 0.24 μM]<br>Asthma: 0.67 μM [95% CI,<br>0.56 to 0.77 μM]<br>( <i>p</i> < 0.0001) | Loukides <i>et al.</i><br>Chest 2002; 121(2): 338–46.  |
| Normal: 0.59 ± 0.03 μM<br>Asthma: 1.89 ± 0.07 μM<br>( <i>p</i> < 0.001)                                             | Ueno <i>et al.</i><br>Respirology 2008;<br>13, 654–663 |
