# Supplementary material
Source: PubMed Central journal article supplement (PMC3526896)
Supplement: Supp_Table1.pdf [file Supp_Table1.pdf]

## Supplementary Data

SUPPLEMENTARY TABLE S1. COMPLETE LIST OF IDENTIFIED PEPTIDES IN COPPER ZINC SUPER OXIDE DISMUTASE

| <i>Peptide sequence</i>                                   | $[M+H]^+$ | $m/z$  |
|-----------------------------------------------------------|-----------|--------|
| <sup>4</sup> AVCVLKGDPVQGIINFEQK <sup>23, a</sup>         | 2172.1    | 725.3  |
| <sup>10</sup> GDGPVQGIINFEQK <sup>23</sup>                | 1501.7    | 751.7  |
| <sup>24</sup> ESNGPVKVVWGSIK <sup>36</sup>                | 1400.8    | 701.3  |
| <sup>80</sup> HVGDLGNVTADK <sup>91, a</sup>               | 1225.6    | 613.6  |
| <sup>80</sup> HVGDLGNVTADKDGADV                           | 3720.8    | 1241.6 |
| SIEDSVISLSGDHCCIIGR <sup>115</sup>                        |           |        |
| <sup>31</sup> VWGSIK <sup>36, a</sup>                     | 689.4     | 345.3  |
| <sup>92</sup> DGVADVSIEDSVISLSGDHCCIIGR <sup>115, a</sup> | 2514.2    | 839.2  |
| <sup>116</sup> TLVVHEK <sup>122, a</sup>                  | 825.5     | 413.2  |
| <sup>116</sup> TLVVHEKADDLGK <sup>128</sup>               | 1242.8    | 713.3  |
| <sup>123</sup> ADDLGKGGNEESTK <sup>136</sup>              | 1420.6    | 711.2  |
| <sup>123</sup> ADDLGKGGNEESTKTGNAGSR <sup>143</sup>       | 2063.9    | 689.1  |
| <sup>137</sup> TGNAGSRLACGVIGIAQ <sup>153</sup>           | 1644.8    | 823.3  |
| <sup>144</sup> LACGVIGIAQ <sup>153, a</sup>               | 1001.5    | 1001.4 |

<sup>a</sup>peptides are also found in corresponding oxidized form.
