# Supplementary material
Source: PubMed Central journal article supplement (PMC3526896)
Supplement: Supp_Table2.pdf [file Supp_Table2.pdf]

SUPPLEMENTARY TABLE S2. HYDROGEN PEROXIDE  
LEVEL IN EXHALED BREATH

| <i>H<sub>2</sub>O<sub>2</sub> concentration in exhaled<br/>breath/exhaled breath condensate</i>                     | <i>Reference</i>                                       |
|---------------------------------------------------------------------------------------------------------------------|--------------------------------------------------------|
| Normal: 0.024 ± 0.016 M<br>Asthma: 0.127 ± 0.083 M<br>( <i>p</i> < 0.001).                                          | Emelyanov <i>et al.</i><br>Chest 2001; 120(4): 1136–9. |
| Normal: 0.2 μM [95% CI,<br>0.16 to 0.24 μM]<br>Asthma: 0.67 μM [95% CI,<br>0.56 to 0.77 μM]<br>( <i>p</i> < 0.0001) | Loukides <i>et al.</i><br>Chest 2002; 121(2): 338–46.  |
| Normal: 0.59 ± 0.03 μM<br>Asthma: 1.89 ± 0.07 μM<br>( <i>p</i> < 0.001)                                             | Ueno <i>et al.</i><br>Respirology 2008;<br>13, 654–663 |
